# Supplementary material for: Transcranial photobiomodulation enhances visual working memory capacity in humans
Source: PubMed Central journal article supplement (PMC10936045; doi:10.1126/sciadv.abq3211), 2022-12-02
Supplement: sciadv.abq3211_sm.pdf [file sciadv.abq3211_sm.pdf]

Supplementary Materials for  
**Transcranial photobiomodulation enhances visual working memory capacity  
in humans**

Chenguang Zhao *et al.*

Corresponding author: Yan Song, [songyan@bnu.edu.cn](mailto:songyan@bnu.edu.cn)

*Sci. Adv.* **8**, eabq3211 (2022)  
DOI: 10.1126/sciadv.abq3211

**This PDF file includes:**

Figs. S1 to S3

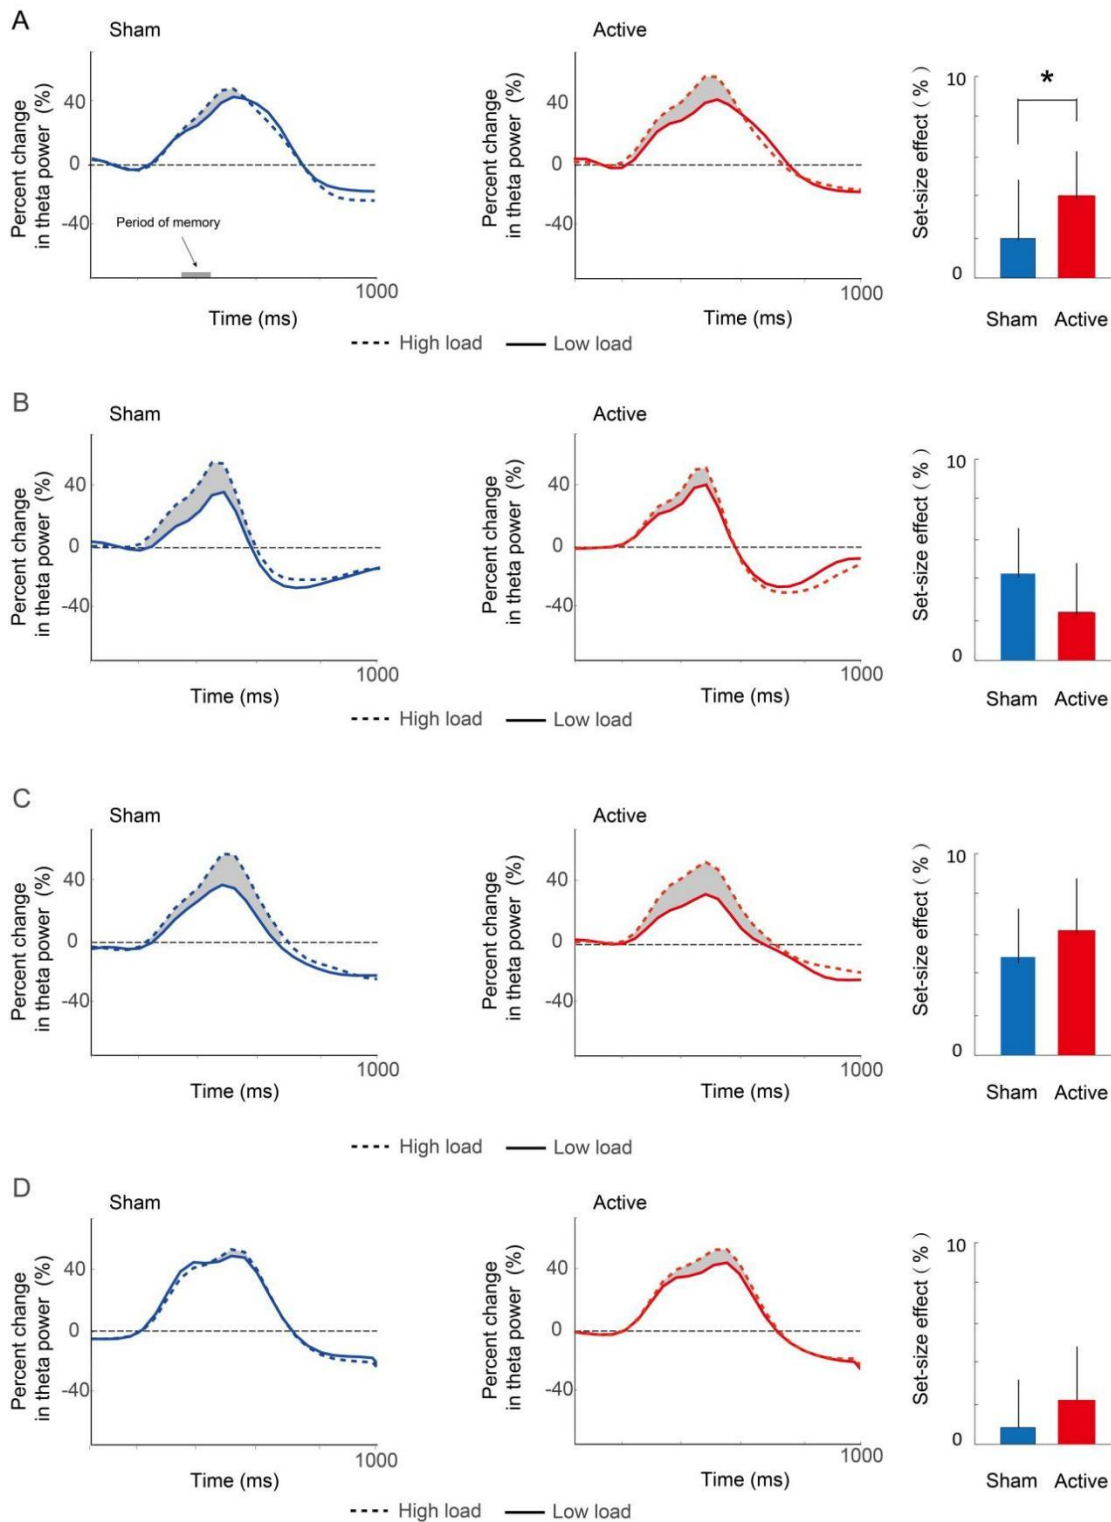

**Figure S1. Theta band ERS results for all experiments.** The theta band ERS for two sessions (active-tPBM and sham-tPBM) in Experiment 1 (A), Experiment 2 (B), Experiment 3 (C), and Experiment 4 (D). Averaged ERS in theta power was observed at the middle frontal electrodes after the onset of the memory array indicated by the grey box. Shading indicates the set-size effect of theta ERS. Right panel, mean set-size effect of theta power enhancement during the retention interval. Error bars represent SEM. \*  $p < 0.05$

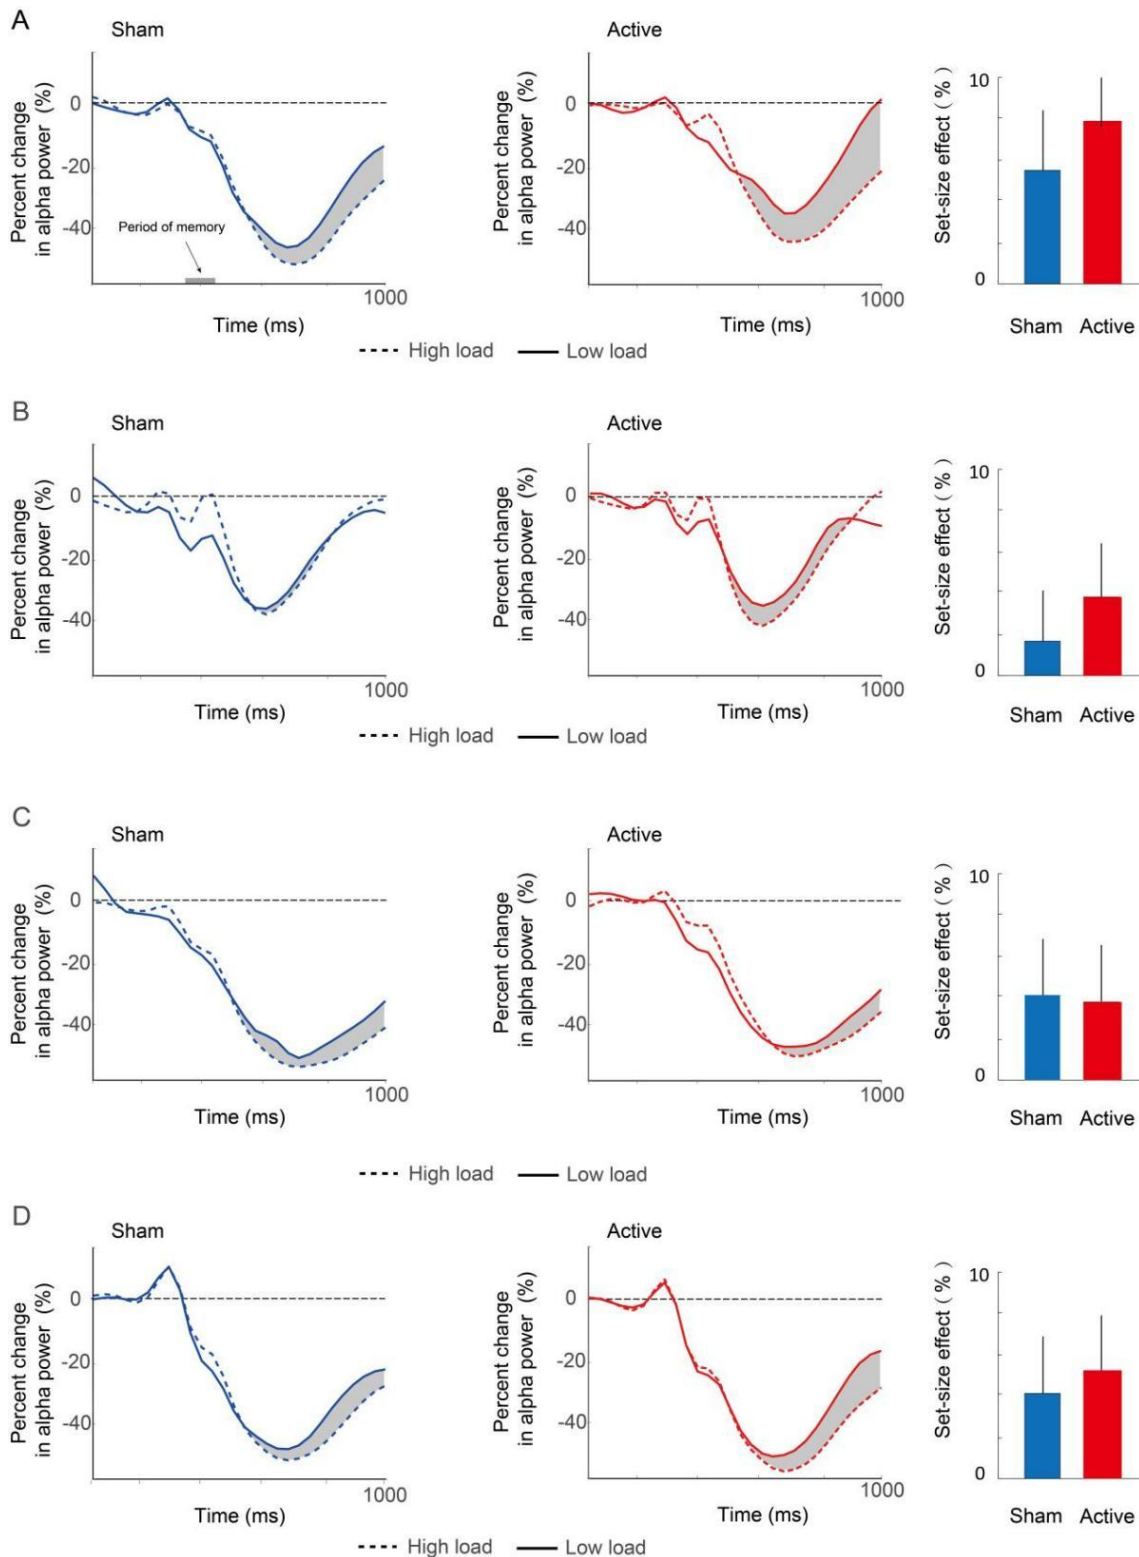

**Fig. S2. Alpha band ERD results for all experiments.** Alpha band ERD for two sessions (active-tPBM, sham-tPBM) in Experiment 1 (A), Experiment 2 (B), Experiment 3 (C), and Experiment 4 (D). Averaged ERD in alpha power was observed at the parieto-occipital electrodes after the onset of the memory array, as indicated by the grey box. Shading indicates the set-size effect of alpha ERD. Right panel, mean set-size effect of alpha band ERD during the retention interval. Error bars represent SEM. No significant difference in the set-size effect of alpha band ERD between active and sham tPBM was found in each experiment ( $ps > 0.150$ ).

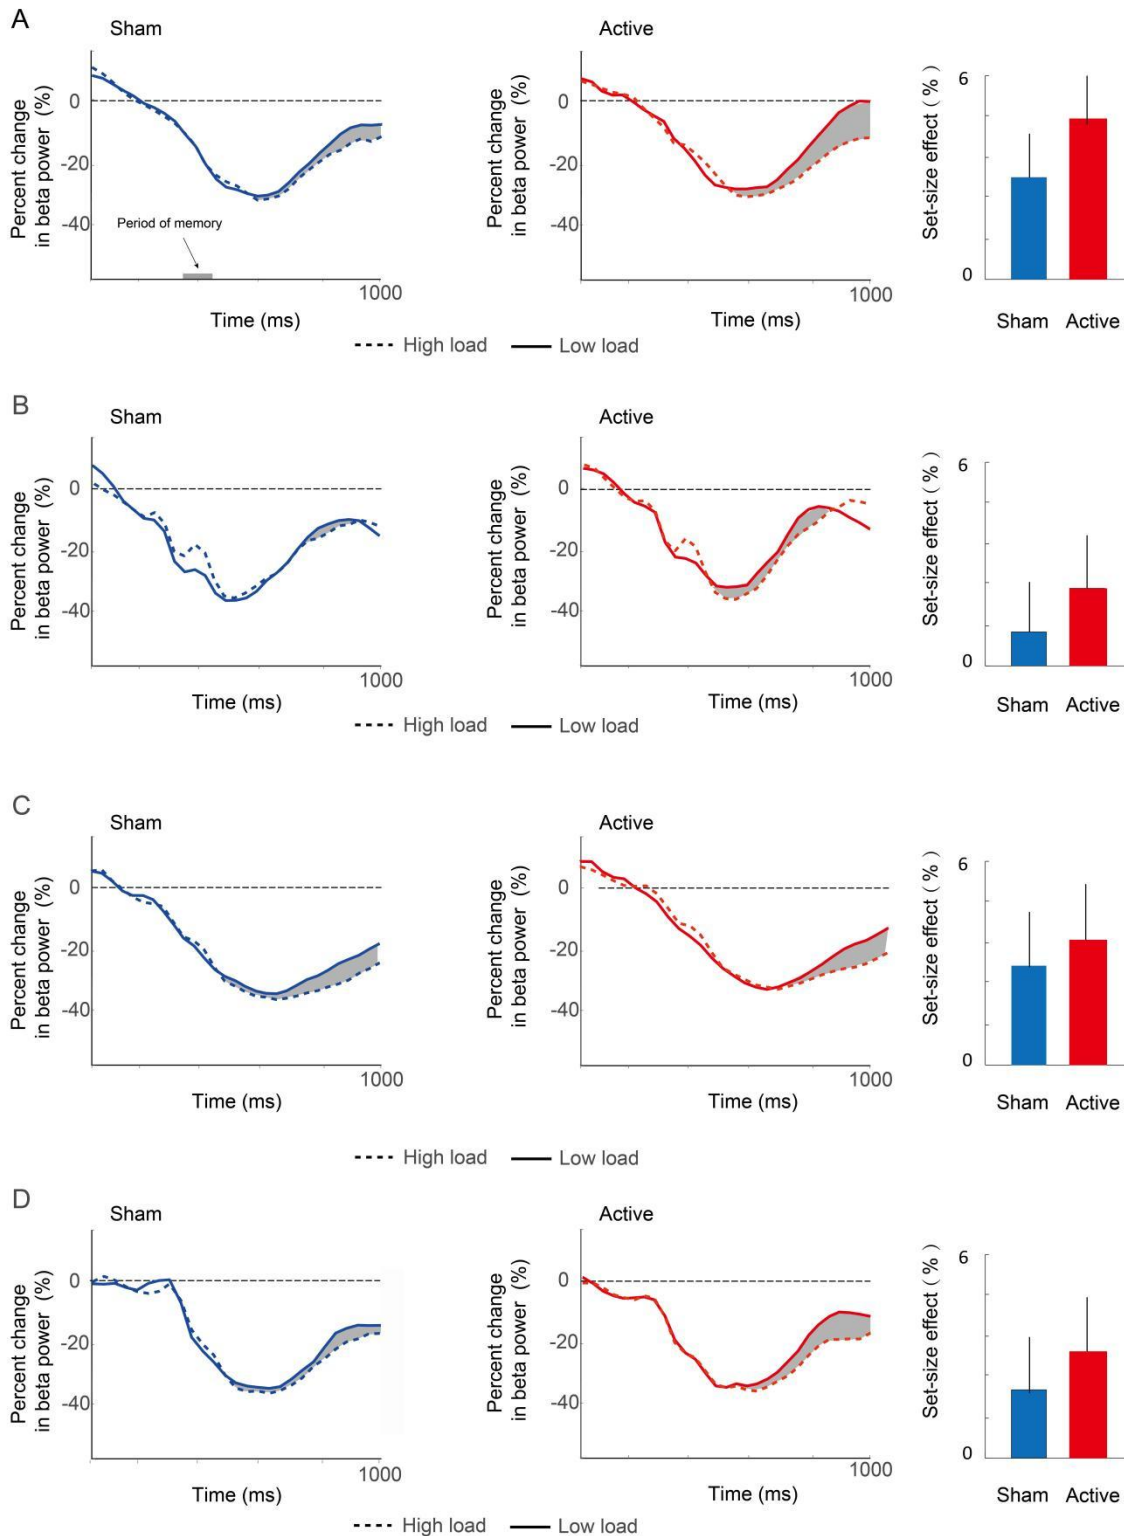

**Figure S3. Beta band ERD results for all experiments.** The beta band ERD for two sessions (active-tPBM and sham-tPBM) in Experiment 1 (A), Experiment 2 (B), Experiment 3 (C), and Experiment 4 (D). Averaged ERD in beta power was observed at the middle frontal electrodes after the onset of the memory array indicated by the grey box. Shading indicates the set-size effect of beta ERD. Right panel, mean set-size effect of beta power suppression during the retention interval. Error bars represent SEM. No significant difference in the set-size effect of beta ERD between active and sham tPBM was found in each experiment ( $ps > 0.227$ ).
